# Supplementary material
Source: MDPI journal article supplement (https://www.mdpi.com/2071-1050/8/3/196)
Supplement: s1 [file s1]

## Sheet: Information
Version 1.0: Example Calculation of National Food System Metrics
Missing values for indicators (see food nutrient adequacy calculation) are ignored when calculating averages.
Sources for all indicator data are as disclosed in the paper.
Please contact Dave Gustafson (dgustafson@ilsi.org, +1-314-409-7123) with any questions.

## Sheet: ARG-Chart
Food Nutrient Adequacy	66.0926
Ecosystem Stability	48.1182
Food Affordability & Availability	70.325
Sociocultural Wellbeing	66.9
Resilience	60.9163
Food Safety	85.2532
Waste & Loss Reduction	66.6667

## Sheet: BGD-Chart
Food Nutrient Adequacy	28.9777
Ecosystem Stability	31.3431
Food Affordability & Availability	41.775
Sociocultural Wellbeing	54.9
Resilience	45.5582
Food Safety	49
Waste & Loss Reduction	81.4815

## Sheet: BRA-Chart
Food Nutrient Adequacy	76.0364
Ecosystem Stability	58.3885
Food Affordability & Availability	68.925
Sociocultural Wellbeing	51.1
Resilience	57.9612
Food Safety	85.2532
Waste & Loss Reduction	66.6667

## Sheet: CMR-Chart
Food Nutrient Adequacy	70.9651
Ecosystem Stability	32.5519
Food Affordability & Availability	45.8
Sociocultural Wellbeing	34
Resilience	52.7928
Food Safety	40.8434
Waste & Loss Reduction	75.5556

## Sheet: CHN-Chart
Food Nutrient Adequacy	43.2985
Ecosystem Stability	39.0333
Food Affordability & Availability	66.05
Sociocultural Wellbeing	56.4
Resilience	66.2175
Food Safety	72.65
Waste & Loss Reduction	64.4444

## Sheet: IND-Chart
Food Nutrient Adequacy	47.3119
Ecosystem Stability	15.196
Food Affordability & Availability	50.225
Sociocultural Wellbeing	37.3
Resilience	55.0803
Food Safety	50.9
Waste & Loss Reduction	81.4815

## Sheet: NLD-Chart
Food Nutrient Adequacy	69.3626
Ecosystem Stability	59.5106
Food Affordability & Availability	85.85
Sociocultural Wellbeing	73.5
Resilience	61.0964
Food Safety	95.3781
Waste & Loss Reduction	58.5185

## Sheet: SEN-Chart
Food Nutrient Adequacy	56.8957
Ecosystem Stability	24.3743
Food Affordability & Availability	40.4
Sociocultural Wellbeing	48.1
Resilience	51.2473
Food Safety	39.7434
Waste & Loss Reduction	75.5556

## Sheet: USA-Chart
Food Nutrient Adequacy	77.1079
Ecosystem Stability	56.6784
Food Affordability & Availability	84.275
Sociocultural Wellbeing	71.9
Resilience	77.3437
Food Safety	95.8268
Waste & Loss Reduction	56.2963

[truncated: 8 more sheets: Food-Nutrient-Adequacy, Ecosystem-Stability, EPI, Affordability-Availability, Sociocultural-Wellbeing, Resilience, Food-Safety, Waste-Loss-Reduction]
